# Supplementary material
Source: publisher site journal article supplement (https://www.spandidos-publications.com/3276/downloadSupplementary)
Supplement: Supplementary file 1 [file downloadSupplementary]

Table SI. Scale for assessment of the quality of the studies.

| Criteria                                                                                                            | Score |
|---------------------------------------------------------------------------------------------------------------------|-------|
| 1. Representativeness of cases                                                                                      |       |
| Selected from population or cancer registry                                                                         | 2     |
| Selected from a gastroenterology/surgery service                                                                    | 1     |
| Selected without clear sampling frame or with broad inclusion/exclusion criteria                                    | 0     |
| 2. Credibility of controls                                                                                          |       |
| Based in a population or neighbourhood                                                                              | 3     |
| Blood donors or volunteers                                                                                          | 2     |
| Cancer-free patients                                                                                                | 1     |
| Healthy volunteers, with lack of total description                                                                  | 0.5   |
| Gastroenterology patients                                                                                           | 0.25  |
| Not described                                                                                                       | 0     |
| 3. Ascertainment of gastric cancer                                                                                  |       |
| Histological/pathological confirmation                                                                              | 2     |
| Diagnosis by patient medical record                                                                                 | 1     |
| Not described                                                                                                       | 0     |
| 4. SNP genotyping                                                                                                   |       |
| Genotyping done under 'blinded' condition                                                                           | 1     |
| Unblinded or not mentioned                                                                                          | 0     |
| 5. Hardy-Weinberg equilibrium                                                                                       |       |
| Hardy-Weinberg equilibrium in controls                                                                              | 2     |
| No Hardy-Weinberg equilibrium in controls                                                                           | 1     |
| Hardy-Weinberg disequilibrium not checked                                                                           | 0     |
| 6. Association assessment                                                                                           |       |
| Association between SNPs and gastric cancer assessed with appropriate statistics and adjustment for confounders     | 2     |
| Association between SNPs and gastric cancer assessed with appropriate statistics without adjustment for confounders | 1     |
| Not appropriate statistics                                                                                          | 0     |

SNP, single nucleotide polymorphism.

Table SII. Quality assessment criteria scores for each study.

| First author, year             | Quality criteria <sup>a</sup> |   |   |   |   |   | Quality assessment score | Refs. |
|--------------------------------|-------------------------------|---|---|---|---|---|--------------------------|-------|
|                                | 1                             | 2 | 3 | 4 | 5 | 6 |                          |       |
| Chen <i>et al</i> , 2018       | 1                             | 1 | 2 | 1 | 2 | 2 | 9                        | (26)  |
| Cavalcante <i>et al</i> , 2017 | 0                             | 0 | 0 | 1 | 2 | 2 | 5                        | (27)  |
| Tas <i>et al</i> , 2017        | 1                             | 0 | 2 | 1 | 2 | 2 | 8                        | (28)  |
| Elingarami <i>et al</i> , 2015 | 1                             | 1 | 2 | 1 | 2 | 1 | 8                        | (21)  |
| Wu and Zhang, 2015             | 1                             | 1 | 1 | 1 | 2 | 2 | 8                        | (31)  |
| Moradi <i>et al</i> , 2013     | 1                             | 0 | 2 | 1 | 2 | 2 | 8                        | (29)  |
| Pan <i>et al</i> , 2013        | 1                             | 1 | 2 | 1 | 2 | 2 | 9                        | (30)  |
| Wang <i>et al</i> , 2009       | 1                             | 3 | 2 | 1 | 2 | 2 | 11                       | (32)  |
| Cho <i>et al</i> , 2008        | 1                             | 0 | 0 | 1 | 2 | 2 | 6                        | (33)  |
| Yang <i>et al</i> , 2007       | 1                             | 3 | 2 | 1 | 2 | 2 | 11                       | (34)  |
| Ohmiya <i>et al</i> , 2006     | 1                             | 2 | 2 | 1 | 2 | 2 | 10                       | (23)  |

<sup>a</sup>Refer to Table S1 for the criteria.
